# Supplementary material for: Optimizing Biomass and Phycobilin Production in Arthrospira platensis Through Carbon Source Variation and Developing a Cost-Effective Purification Method
Source: Research Square preprint supplement (doi:10.21203/rs.3.rs-7284160/v1), 2025-09-01
Supplement: Supplementary file 1 [file 0f56af3267eca449c87b7984.docx]

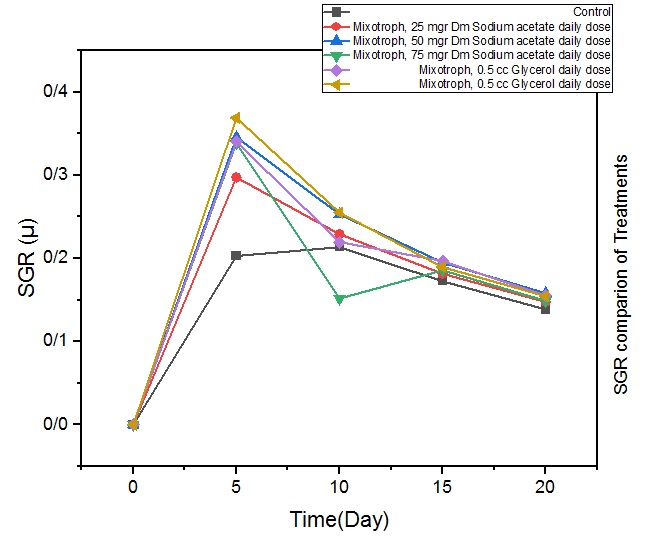


**Fig 1**: SGR comparison between treatments during 20 days of cultivation of *Arthrospira platensis.*

**Fig 2:** Biomass production for *Arthrospira platensis* based on the number of cells produced per 20 days of culture.

**Fig 3:** Phycobilin pigment production in cultures of *Arthrospira platensis* after 20 days of cultivation (Data shown as % of pigment/crude extract).


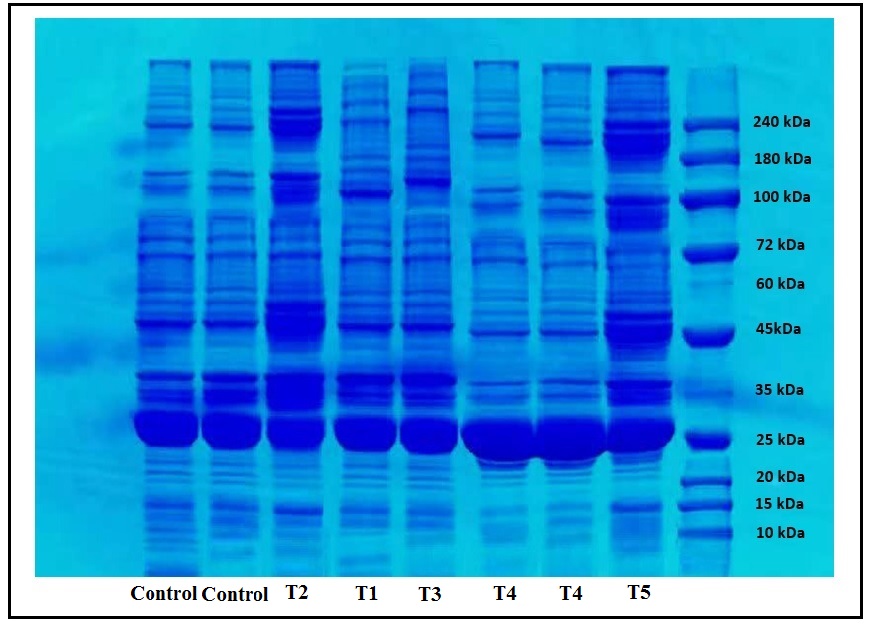


**Fig 4:** SDS-PAGE results for crude extracts of *Arthrospira platensis* samples cultivated using different carbon sources. Bands for Phycocyanin (20-25 kDa), Phycoerythrin (240 kDa), and Allophycocyanin (100-110 kDa) are visible.

**Table 1:** Chemical composition of Zarrouk culture medium with some modifications ([Zarrouk, 1966](#_ENREF_69)). Solution A5: (gL-1): H3BO3, 2.86- MnCl2.4H2O, 1.81- ZnSO4.7H2O, 0.222 – Na2MoO4.2H2O, 0.390 – CuSO2.5H2O, 0.79 Solution B6(mg L-1): NH4VO3, 22.86 – KCr (SO4)2.12H2O, 192 – NiSO4.6H2O, 44.8 – Na2WO4.2H2O, 17.94 – TiOSO4.8H2O, 61.1 – CO(NO3)2.6H2O, 43.98

| **Reagents** | **Amount(gL-1)** |
| --- | --- |
| NaHCO3 | 16.8 |
| K2HPO4 | 0.50 |
| NaNO3 | 2.5 |
| SK2SO4 | 1.00 |
| NaCl | 1.00 |
| MgSO4.7H2O | 0.20 |
| CaCl2 | 0.04 |
| FeSO4.7H2O | 0.01 |
| EDTA | 0.08 |
| Solution A5 | 1 ml |
| Solution B6 | 1ml |

**Table 2:** *Arthrospira platensis* Cultivation specifications by treatment for one-liter batch culture during 20 days of cultivation. (*Significance level at α = 0.05

*Significant changes are shown in alphabetical order)

| **Treatments** | **pH first-day** | **pH20th day** | **Biomass First-day Cell/L** | **Biomass last day**  **Cell/L** | **Algae weight**  **gr DM** | **SGR**  **(µ/d)** |
| --- | --- | --- | --- | --- | --- | --- |
| Control (photoautotroph) | 9.2 ±0.001 | 9.63 ± 0.047 | 2×107 ± 0.047 | 32 × 107 ± 4714045 | 3.41 ± 0.004 | 0.14 ± 0.001 |
| Sodium acetate 25 mg/L (T1) | 9.2 ±0.001 | 9.90 ± 0.16 a | 2×107 ± 0.047 | 38 × 107 ± 12472191c | 4.04 ± 0.22c | 0.15 ± 0.001ab |
| Sodium acetate 50 mg/L (T2) | 9.2 ±0.001 | 10.7 ± 0.12 b | 2×107 ± 0.047 | 47 × 107 ± 12472191a | 4.96 ± 0.07 a | 0.16 ± 0.001a |
| Sodium acetate 75 mg/L (T3) | 9.2 ±0.001 | 9.80 ± 0.08ab | 2×107 ± 0.047 | 39 × 107 ± 16996732c | 4.03 ± 0.028 c | 0.15 ± 0.002b |
| Glycerol 0.5 cc (T4) | 9.2 ±0.001 | 10.7 ± 0.12 c | 2×107 ± 0.047 | 44 × 107 ± 9428090b | 4.07 ± 0.085 a | 0.16 ± 0.000a |
| Glycerol 1 cc (T5) | 9.2 ±0.001 | 10 ± 0.08 ac | 2×107 ± 0.047 | 44 × 107 ± 8164965b | 4.54 ± 0.08 b | 0.15 ± 0.001b |

**Table 3:** weight gain statistics obtained by Origin Pro 2021 during 20 days of cultivation for *Arthrospira platensis.*

| Carbon Source | Growth equation | **(SLOPE)** |
| --- | --- | --- |
| Control | Y= a+b*x | 0.1765 ± 0.019 |
| 25 mg Dm/l Sodium acetate (T1) | Y= a+b*x | 0.1981 ±0.0127 |
| 50 mg Dm/l Sodium acetate (T2) | Y= a+b*x | 0.2278 ± 0.0057 |
| 75 mg Dm/l Sodium acetate (T3) | Y= a+b*x | 0.24226 ± 0.0086 |
| 0.5 cc Glycerol (T4) | Y= a+b*x | 0.23204 ± 0.011 |
| 1 cc Glycerol (T5) | Y= a+b*x | 0.23217 ± 0.015 |

**Table 4:** The results of the one-way ANOVA to check the significance of the differences between the optical absorption of samples dried by spray drying, freeze-drying, and oven. (٭Significant differences at α= 0.05)

|  | | **Sum of squares** | **df** | **Mean square** | **F** | **Sig.** |
| --- | --- | --- | --- | --- | --- | --- |
| 680 nm | Between groups | 0.283 | 2 | 0.141 | 1.397 | 0.273 |
| Within groups | 1.820 | 18 | 0.101 |  |  |
| Total | 2.103 | 20 |  |  |  |
| 620 nm | Between groups | 23.611 | 2 | 11.806 | 4.211 | 0.032 * |
| Within groups | 50.466 | 18 | 2.804 |  |  |
| Total | 74.078 | 20 |  |  |  |
| 280 nm | Between groups | 67.029 | 2 | 33.514 | 2.347 | 0.124 |
| Within groups | 257.017 | 18 | 14.279 |  |  |
| Total | 324.046 | 20 |  |  |  |
